# Supplementary material for: Typical 2-Cys Peroxiredoxins as a Defense Mechanism against Metal-Induced Oxidative Stress in the Solitary Ascidian Ciona robusta
Source: MDPI journal article supplement (doi:10.3390/antiox11010093), 2021-12-30
Supplement: s1 [file s1]

## SUPPLEMENTARY MATERIAL

### Tables

**Table S1.** Primer sequences, and relative melting temperatures ( $T_m$ ), used for reverse transcription (Oligo-dT Anchor primer) and for PCR amplification.

| Primers          | Sequences 5'-3'                      | $T_m$ (°C) |
|------------------|--------------------------------------|------------|
| Oligo-dT Anchor  | ACCACGCGTATCGATGTCG(T) <sub>16</sub> | 75.2       |
| CrPrdx2fw        | AGTCCGCCCCAGATTTTA                   | 56.8       |
| CrPrdx2rv        | CCGTGCTGGTCTGTGAAC                   | 57.6       |
| CrPrdx3fw        | TACACGGGTTTCGACGGA                   | 57.0       |
| CrPrdx3rv        | GATCCTGGTGTCCAAC TAG                 | 56.4       |
| CrPrdx4fw        | GCTTGTTCTTGCTCACA                    | 55.0       |
| CrPrdx4rv        | AGACCTCACCATGCTCAT                   | 54.4       |
| Cr $\beta$ actfw | TGATGAAGATCTTGACCGAG                 | 54.6       |
| Cr $\beta$ actrv | CTTGTTTGCTGATCCACATC                 | 55.2       |

**Table S2.** Primer sequences, and relative melting temperatures ( $T_m$ ), used for qRT-PCR amplification.

| Primers             | Sequences 5'-3'       | $T_m$ (°C) |
|---------------------|-----------------------|------------|
| CrPrdx2fw_RT        | CCGCCCCAGATTTTACGGCAA | 63.3       |
| CrPrdx2rv_RT        | GCACCTCACACCCAATATCAC | 62.5       |
| CrPrdx3fw_RT        | CGGGTTTCGACGGACACATAC | 61.5       |
| CrPrdx3rv_RT        | CTTTGAATGGTGGAGCAGGC  | 60.6       |
| CrPrdx4fw_RT        | TCTGAGGGAGGTCTTGAAA   | 60.1       |
| CrPrdx4rv_RT        | AGAGCCACGAAGAGTGTGT   | 60.0       |
| Cr $\beta$ actfw_RT | CCTTGGTATGGAATCTGCTG  | 62.1       |
| Cr $\beta$ actrv_RT | GAGAGAACGGTGTTGGCGTA  | 65.2       |

**Table S3.** GenBank accession numbers and ANISEED transcript IDs (*Ciona robusta*, *Ciona intestinalis* and *Botrylloides leachii*) referred to amino acid sequences of Prdx2, Prdx3 and Prdx4 used for multi-alignment and phylogenetic analyses.

| Species                        | Prdx2                   | Prdx3                 | Prdx4                |
|--------------------------------|-------------------------|-----------------------|----------------------|
| <i>Ciona robusta</i>           | KY.Chr8.1384.v1.nonSL16 | KY.Chr10.1364.v1.ND1  | KY.Chr10.1036.v1.SL1 |
| <i>Ciona intestinalis</i>      | KH.L17.4.v1.A.nonSL9    | KH.S396.2.v1.A.nonSL5 | KH.C10.328.v1.A.SL1  |
| <i>Botrylloides leachii</i>    | Boleac.CG.SB_v3.S416    | Boleac.CG.SB_v3.S163  | Boleac.CG.SB_v3.S416 |
| <i>Danio rerio</i>             | NP_001002468.1          | NP_001013478.3        | NP_001082894.1       |
| <i>Oryzias latipes</i>         | XP_011478972.1          | XP_023819390.1        | XP_004076406.1       |
| <i>Mylopharyngodon piceus</i>  | ALD62538.1              | ALD62539.1            | ALD62540.1           |
| <i>Callorhinchus milii</i>     | XP_007905343.1          | XP_007903837.1        | NP_001279887.1       |
| <i>Xenopus laevis</i>          | AEM44539.1              | AEM44540.1            | AEM44541.1           |
| <i>Rhinatrema bivittatum</i>   | XP_029440999.1          | XP_029466379.1        | XP_029459262.1       |
| <i>Chelonia mydas</i>          | XP_037743763.1          | XP_037761793.1        | XP_037757601.1       |
| <i>Python bivittatus</i>       | XP_007421035.1          | XP_007429204.1        | XP_007436716.1       |
| <i>Podarcis muralis</i>        | XP_028573219.1          | XP_028585929.1        | XP_028583327.1       |
| <i>Anas platyrhynchos</i>      |                         | XP_027316512.2        | XP_027304862.1       |
| <i>Lepidothrix coronate</i>    |                         | XP_017664753.1        | XP_017682647.1       |
| <i>Tupaia chinensis</i>        | XP_006161057.1          | XP_006160463.1        | XP_027626915.1       |
| <i>Myotis myotis</i>           | XP_036158570.1          | XP_036191702.1        | XP_036161216.1       |
| <i>Mus musculus</i>            | NP_035693.3             | NP_031478.1           | NP_001300640.1       |
| <i>Vicugna pacos</i>           | XP_006206304.1          | XP_006200224.1        | XP_006213064.1       |
| <i>Bos indicus</i>             | XP_019819615.1          | XP_019808318.1        | XP_019811886.1       |
| <i>Equus caballus</i>          | XP_023501083.1          | XP_001493666.1        | XP_023489068.1       |
| <i>Canis lupus</i>             | XP_038284392.1          | NP_001243414.1        | XP_038305572.1       |
| <i>Homo sapiens</i>            | NP_005800.3             | ABB84468.1            | NP_006397.1          |
| <i>Macaca mulatta</i>          | NP_001248186.1          | NP_001252755.1        | NP_001180740.1       |
| <i>Clonorchis sinensis</i>     | AEK86199.1              |                       |                      |
| <i>Schistosoma haematobium</i> |                         | XP_012798879.1        |                      |
| <i>Drosophila melanogaster</i> |                         | NP_524387.1           |                      |
| <i>Amphioctopus fangsiao</i>   |                         |                       | AGF80254.1           |
| <i>Sepiella maindroni</i>      |                         |                       | AKN23454.1           |
| <i>Crassostrea gigas</i>       | XP_011441532.1          |                       |                      |
| <i>Aplysia californica</i>     | XP_005089483.1          |                       |                      |
| <i>Scylla paramamosain</i>     |                         | ASS34530.1            | ASS34531.1           |
| <i>Culex pipiens</i>           | XP_001852614.1          |                       |                      |

**Table S4.** Percentages of identity, similarity and *E*-values obtained by comparing Cr-Prdx2 amino acid sequence with orthologous sequences of metazoans.

| Species                     | % identity | % similarity | <i>E</i> -values |
|-----------------------------|------------|--------------|------------------|
| <i>Danio rerio</i>          | 74.6       | 90.4         | 5.8e-84          |
| <i>Python bivittatus</i>    | 74.6       | 88.8         | 4.7e-81          |
| <i>Mus musculus</i>         | 71.1       | 92.4         | 5.7e-87          |
| <i>Homo sapiens</i>         | 70.6       | 89.8         | 1.0e-87          |
| <i>Crassostrea gigas</i>    | 70.6       | 88.7         | 3.3e-81          |
| <i>Xenopus laevis</i>       | 67.5       | 90.4         | 9.1e-80          |
| <i>Botrylloides leachii</i> | 66.3       | 87.8         | 1.3e-72          |
| <i>Culex pipiens</i>        | 65.5       | 88.7         | 7.6e-76          |
| <i>Clonorchis sinensis</i>  | 59.9       | 83.4         | 2.4e-67          |

**Table S5.** Percentages of identity, similarity and *E*-values obtained by comparing Cr-Prdx3 amino acid sequence with orthologous sequences of metazoans.

| Species                        | % identity | % similarity | <i>E</i> -values |
|--------------------------------|------------|--------------|------------------|
| <i>Xenopus laevis</i>          | 72.4       | 89.2         | 8.1e-82          |
| <i>Danio rerio</i>             | 71.8       | 88.3         | 3.8e-85          |
| <i>Python bivittatus</i>       | 71.3       | 88.6         | 5.6e-82          |
| <i>Anas platyrhynchos</i>      | 70.4       | 89.7         | 1.5e-84          |
| <i>Mus musculus</i>            | 70.0       | 88.3         | 2.0e-75          |
| <i>Scylla paramamosain</i>     | 67.0       | 86.7         | 5.2e-79          |
| <i>Drosophila melanogaster</i> | 66.7       | 90.1         | 4.3e-78          |
| <i>Homo sapiens</i>            | 66.7       | 87.2         | 2.0e-74          |
| <i>Botrylloides leachii</i>    | 64.7       | 88.9         | 9.1e-51          |
| <i>Schistosoma haematobium</i> | 64.6       | 85.4         | 3.3e-79          |

**Table S6.** Percentages of identity, similarity and *E*-values obtained by comparing Cr-Prdx4 amino acid sequence with orthologous sequences of metazoans.

| Species                     | % identity | % similarity | <i>E</i> -values |
|-----------------------------|------------|--------------|------------------|
| <i>Botrylloides leachii</i> | 88.9       | 96.6         | 8.6e-100         |
| <i>Danio rerio</i>          | 78.2       | 91.3         | 4.1e-102         |
| <i>Homo sapiens</i>         | 77.9       | 91.5         | 3.3e-88          |
| <i>Xenopus laevis</i>       | 77.2       | 91.6         | 2.3e-94          |
| <i>Anas platyrhynchos</i>   | 76.7       | 90.6         | 6.4e-90          |
| <i>Sepiella maindroni</i>   | 76.6       | 92.5         | 9.0e-98          |
| <i>Python bivittatus</i>    | 75.5       | 91.2         | 4.1e-85          |
| <i>Mus musculus</i>         | 74.6       | 90.6         | 6.6e-79          |
| <i>Scylla paramamosain</i>  | 67.8       | 85.5         | 2.0e-90          |

## Figures

```

1   gtt ata atc atg tcc gcc ggt aaa gct tgc att caa aag tcc gcc cca gat ttt acg gca
   M S A G K A C I Q K S A P D F T A
61  aca gca gtt gtg aac gga gat ttt cgt gat att tca cta agc gaa tat aaa gga aaa tat
   T A V V N G D F R D I S L S E Y K G K Y
121 gtt gtt ttg ttt ttt tac ccg ctc gac ttc acg ttc gtt tgc ccg acg gag atc att gcg
   V V L F F Y P L D F T F V C P T E I I A
181 ttt agt gat cgt gtg tca gag ttc cgt gat att ggg tgt gag gtg ctc gcg tgt tcc aca
   F S D R V S E F R D I G C E V L A C S T
241 gac tca cac ttc agt cat ctc gca tgg aca aac atc cca agg aag aag ggg gga atc gga
   D S H F S H L A W T N I P R K K G G I G
301 aac atg aaa atc ccg ttg att gcc gac aaa aac tgt gca ata tct aaa gac tac ggg gtt
   N M K I P L I A D K N C A I S K D Y G V
361 ttg atg gaa ggc agt gga atc gcg ttc agg gga ttg ttc atc gat acc atg gga att
   L M E G S G I A F R G L F I I D T M G I
421 ctt cgg caa ata acg att aat gat ttg cct gtc ggt cgc tca gtg gac gag acg cta cga
   L R Q I T I N D L P V G R S V D E T L R
481 ttg gtc aaa gcg ttt cag ttc aca gac cag cac ggc gag gtt tgc cct gct gtt tgg aaa
   L V K A F Q F T D Q H G E V C P A G W K
541 ccc ggc gat gat acg atc aaa cca gat gtt caa gat agc cag aaa tat ttc agt aaa caa
   P G D D T I K P D V Q D S Q K Y F S K Q
601 taa aca ccc ctg tga ata ttt cag cat cgt tta ttt aca ttt att aca aag gca gta gta
   -
661 ttt aat

```

**Figure S1.** Cr-Prdx2 cDNA sequence and relative amino acid sequence; 5'- and 3'-UTR regions are underlined; in grey sequence obtained with the amplicon sequencing; degradation signals are boxed in bold.

```

1   gtc ata cat gcg cag taa caa cac gaa acg aag aaa att cac ttt tct ata ttc taa cag
61  aat ttc ttt ctg taa tgt ttt gac ttc tgt taa tta gaa tat aca aat agt tat tac atc
121 atg ttt att aat aga ttg gta cac ggg ttt cga cgg aca cat aca ttg cag tcc agt ctt
   M F I N R L V H G F R R T H T L Q S S L
181 aac cca tgg atc tca aaa tgg aat cca aac tca gcc agt att tca aca tca tgc aga tcc
   N P W I S K W N P N S A S I S T S C R S
241 atg gtt gcc cag gta aca cag cct gct cca cca ttc aaa ggt atg tcc gtg gta gaa gga
   M V A Q V T Q P A P P F K G M S V V E G
301 aaa ttc aag gaa ata tca ctt gaa gat tac aag gga aaa tat ttg gtt ctc ttc tac
   K F K E I S L E D Y K G K Y L V L F F Y
361 cct ctt gat ttc act ttt gtt tgc ccc act gaa atc atc tca ttc agc gac aaa agt cca
   P L D F T F V C P T E I I S F S D K S P
421 gag ttt gaa aaa ctt gac aca gcg gtt gta gga gcc tca gtt gac tct ctc agc cat
   E F E K L D T A V V G A S V D S H F S H
481 ctt gcg tgg ata aat aca cct agg aaa caa ggg gga ctt gga gaa atg aaa ata ccc ctg
   L A W I N T P R K Q G G L G E M K I P L
541 ctt tcc gat ctt act aaa aat ata tca aga gat tat ggg gtg act ctg gag aat gct ggg
   L S D L T K N I S R D Y G V L L E N A G
601 att gca ttg aga ggg ttg ttc ata att gat cca tcc gcc acc ata agg cac gcg agc gtt
   I A L R G L F I I D P S G T I R H A S V
661 aat gat ttg cct gtt gga agg tct gtt gat gaa gtt ttg agg ttg gtt caa gct ttc cag
   N D L P V G R S V D E V L R L V Q A F Q
721 ttt gtt gac aaa cat ggg gag gtg tgc cct gct agt tgg aca cca gga tca aaa act atc
   F V D K H G E V C P A S W T P G S K T I
781 aaa cca agt gtg gat tct tca aag aca tat ttt gaa gag gca aat taa aac aca cat act
   K P S V D G S K T Y F E E A N -
841 gtc aac tat cat gta caa att gta ttt att ttt tgg gta caa atc gca cgc att taa tct
901 ttt ggt tgt att caa taa ata tac tgt gta ctc taa tgt aca caa ttt att tat ttg gtt
961 gta tct aat aaa tca att taa tac aac ata act att tag tat tta tta ttc ttt tta atc
1021 aca gca gcg aag acc aaa ttc att aaa aca atg aag aga agg aaa tta gca gca aaa taa
1081 cag tta tta aaa cct agt tta att gca aaa ttt tgg cga ccc aat ttc cga aac tac att
1141 tca cac aac ttt tgt aag cat gaa ata aaa tga ttt tac ttt tac aat

```

**Figure S2.** Cr-Prdx3 cDNA sequence and relative amino acid sequence; 5'- and 3'-UTR regions are underlined; in grey sequence obtained with the amplicon sequencing; polyadenylation signals are boxed in double line; degradation signals are boxed in bold.

```

1  gct tct tag ttt ttg tgt ata att agg ctt ttc gtt tga tct gca ttg att tgc gca aac
61  atg gga gtc tca ttt caa ctt ttc act ctt gca tgc ttg ttc ctt gct cac agt gga ata
   M  G  V  S  F  Q  L  F  T  L  A  C  L  F  L  A  H  S  G  I
121  tgc caa gaa cgt gct gtt ttc tgg cca cca tat gaa agt cac ttg ctg caa tct acc aaa
   C  Q  E  R  A  V  F  W  P  P  Y  E  S  H  L  L  Q  S  T  K
181  gct caa atc tcg aaa cca gcg cca gac tgg gag ggt aca gcc att gtc gat ggt gaa att
   A  Q  I  S  K  P  A  P  D  W  E  G  T  A  I  V  D  G  E  I
241  aaa aca ata aag ctg gga gat tac aaa gga aaa tac ctt att ttc ttt ttt tac cct ctt
   K  T  I  K  L  G  D  Y  K  G  K  Y  L  I  F  F  F  Y  P  L
301  gat ttc act ttt gta tgt cca act gag atc att gcc ttc tca gac agg gtt gct gag ttt
   D  F  T  F  V  C  P  T  E  I  I  A  F  S  D  R  V  A  E  F
361  aag aaa att aat gct gaa gtt gtg gca gct tct gtt gat tct cac ttc acc cat ctc gca
   K  K  I  N  A  E  V  V  A  A  S  V  D  S  H  F  T  H  L  A
421  tgg tta aac acc cat cgc tct gag gga ggt ctt gga aaa ctc aac att cct ctt ctg tca
   W  L  N  T  H  R  S  E  G  L  G  K  L  N  I  P  L  L  S
481  gat ctc act cat aag ata tca agg gat tat gga gtc ctt cta gag gac ctc gga cac act
   D  L  T  H  K  I  S  R  D  Y  G  V  L  L  E  D  L  G  H  T
541  ctt cgt ggg ctc ttc atc att gat ccc aaa ggt atc ctg aga cag atc act atg aat gat
   L  R  G  L  F  I  I  D  P  K  I  I  L  R  Q  I  T  M  N  P
601  ctt cca gtt gga aga tct gta gac gag act ttg aga ttg gtc caa gca ttc caa cat act
   L  P  V  G  R  S  V  D  E  T  L  R  L  V  Q  A  F  Q  H  T
661  gat gag cat ggt gag gtc tgt cct gct ggt tgg gag cca ggt aaa gac acc att att cca
   D  E  H  G  E  V  C  P  A  G  W  E  P  G  K  D  T  I  I  P
721  gac ccc aag gat aaa ctg aag tac ttc cac aaa aca tca aaa gcc aag ggt gaa ttg taa
   D  P  K  D  K  L  K  Y  F  H  K  T  S  K  A  K  G  E  L  -
781  act gtt gaa atg tca tct gtg tct tgt ttt att ggt tgt tgt tgt ttg tag ggt gtg tgt
841  ttg ttt aag atg aag cag ctg tag ggt tat cag tgc aat ttc aag aaa gaa ata gtt taa
901  tca ctt taa tgt gtc tgt ttt caa gaa agc aat agt tta atc cct tta agt gtc tgt taa
961  aag ctg tgc gta ttt atc tta aac ttt tgt aaa att tag cag cct tta aat tga aaa aaa
1021 aaa ctg ttg tgt ttg ttg cta tta tct aat tgt gcc aaa gtt aag ttt ctg tac caa aat
1081 tat att gta att cat ttt cta aaa caa ttg tgt cat gtt ctg caa ttt aat tat tgt gtc gga
1141 ctg tcg gtt acc tgt atg tgt aat aaa gca atg ttt ttg cga ttt tgt tgg tca tgt atc
1201 gta tgt gtg gac taa aat gtg ttt atg ttt cgt ttc aac

```

**Figure S3.** Cr-Prdx4 cDNA sequence and relative amino acid sequence; 5'- and 3'-UTR regions are underlined; in grey sequence obtained with the amplicon sequencing; polyadenylation signals are boxed in double line; degradation signals are boxed in bold.

|                                       |                                                                             |     |
|---------------------------------------|-----------------------------------------------------------------------------|-----|
| <i>Clonorchis sinensis</i>            | -----MALLPNQP                                                               | 8   |
| <i>Culex pipiens quinquefasciatus</i> | -----MSFATKALLRNIPQLS-KLASSGTV---QKNLFHTARALSVAQVQKP                        | 43  |
| <i>Botrylloides leachii</i>           | -----MKLFIIICFIIVTVLANDEEQKYGGMP-GMFWPP---YQSHLLQSTKAQISKP                  | 48  |
| <i>Crassostrea gigas</i>              | MASSVNMLFFGVICLIACFTCRAADDDKCQS FAGGSVFVPQETRRTSGHAIQWSQAVISKP              | 60  |
| <i>Ciona robusta</i>                  | -----MSAGKACIQKS                                                            | 11  |
| <i>Xenopus laevis</i>                 | -----MACPVRAVKTHIGKP                                                        | 15  |
| <i>Homo sapiens</i>                   | -----MASGNARIQKP                                                            | 11  |
| <i>Mus musculus</i>                   | -----MASGNAQIGKS                                                            | 11  |
| <i>Danio rerio</i>                    | -----MSAGNAKIQGP                                                            | 11  |
| <i>Python bivittatus</i>              | -----MASGKAHIGKP                                                            | 11  |
|                                       | :                                                                           |     |
| <i>Clonorchis sinensis</i>            | APEFSGMAVVNGEFKNISLKDYRGKYVILFLFYPLDFTFVCPTELIAFSDAAEEFKSKNCV               | 68  |
| <i>Culex pipiens quinquefasciatus</i> | APPFSGTAVVNDKEIKLADFPGKYLVLEFFYPPLDFTFVCPTETI IAFSDRIKDFHALNAE              | 103 |
| <i>Botrylloides leachii</i>           | APSWEGETAIVDGEIKTIKSDDYLGKYLIFFFYPPLDFTFVCPTETI IAFSDRAEEFRKIGAE            | 108 |
| <i>Crassostrea gigas</i>              | APDFNGTAVIKGEFKDIKLSDYKGKYLVEFFYPPLDFTFVCPTETI IAFSDRVGEFKINTE              | 120 |
| <i>Ciona robusta</i>                  | APDETATAVVNGLFRDISLSEYKGYVVLFFYPPLDFTFVCPTETI IAFSDRVSEFRDIGCE              | 71  |
| <i>Xenopus laevis</i>                 | SPAFAQTALVNGEFGKQLSLDTLGKYVVLFFYPPLDFTFVCPTETI IAFSNHAEDFKKINCQ             | 75  |
| <i>Homo sapiens</i>                   | APDFKATAVVDGAFKEVKLSLDYKGKYVVLFFYPPLDFTFVCPTETI IAFSNRAEDFRKLGC             | 71  |
| <i>Mus musculus</i>                   | APDETATAVVDGAFKEIKLSLDYRGKYVVLFFYPPLDFTFVCPTETI IAFSDHAEDFRKLGC             | 71  |
| <i>Danio rerio</i>                    | APQFKATAVVDGQFKDIQLSDYRGKYVVLFFYPPLDFTFVCPTETI IAFSERAAEFKINAVE             | 71  |
| <i>Python bivittatus</i>              | VPDFHATAVVDGTIKDKLSLDYRGKYVVLFFYPPLDFTFVCPTETI IAFNDRVEEFRKINCE             | 71  |
|                                       | * : . * : : . : : . : : * : : : * : : : : : : : : : : : :                   |     |
| <i>Clonorchis sinensis</i>            | IIGCSTDSVYAHLQWTMDRKGVGGLGKMNIPLLSDKNMKISRAYHVLDEEGHAFRGQFL                 | 128 |
| <i>Culex pipiens quinquefasciatus</i> | VVGVSVDSSHESHLAWCNTPRKSGGLGKLEYPLLADLTKKISADYGVLLEEAGISLRGLFI               | 163 |
| <i>Botrylloides leachii</i>           | VVACSVDSHFTHLAWNTTERKEGGLGKINIPLLSDLTHKISRDAYGVLLDELGHTRLGLFI               | 168 |
| <i>Crassostrea gigas</i>              | VVIACVSQFTHLAWINTPRAKGGLGPMNIPLLSDTITHEISKAYGVYLQDLGHSRLGLFI                | 180 |
| <i>Ciona robusta</i>                  | VLA CS FDS HFSHLAWTN PRKKG GIGNMKI PLI AD KNC A ISKD Y GVLM EGS GIA FR GLFI | 131 |
| <i>Xenopus laevis</i>                 | LIAVSVDSQFTHLAWTKVPRKEGGLGPVNIPLVSDLTHSIADYGV LK EEDG VAY RGLFI             | 135 |
| <i>Homo sapiens</i>                   | VLGVSVD SQF THLAWINTPRKEGGLGPLNI PLLADVTRRLSEDYGV LKT DEGI AY RGLFI         | 131 |
| <i>Mus musculus</i>                   | VLGVSVD SQF THLAWINTPRKEGGLGPLNI PLLADVTKSLSQNYGV LKN DEGI AY RGLFI         | 131 |
| <i>Danio rerio</i>                    | LIAASTDSHESHLAWINTPRKQGGLGSMNIPLVADLTQ SISRDAYGV LK EDEGI AY RGLFV          | 131 |
| <i>Python bivittatus</i>              | VIAASVDSQFTHLAWINTSRKEGGLGSTNIPLVADINHNSKDYGV LK EEDG VAIY RGLFI            | 131 |
|                                       | : : . * . * : : * : : * : * * : * : * : * : : : : : : : * : : *             |     |
| <i>Clonorchis sinensis</i>            | IDPKGVLRQITVNDRPVGRSVEEAIRLLEAFHFHEQHGEVCPAKWKPK--GKTMKADPVA                | 186 |
| <i>Culex pipiens quinquefasciatus</i> | IDPNGVVRQVTINDLPVGRSVDETLRLIKAFAQFVEKHGEVCPANWDPKANADTIKDPKG                | 223 |
| <i>Botrylloides leachii</i>           | IDPKGILRQITIMNDLPVGRSVDETLRLVQAFOQHTDQHGEVCPAGWQPG--SDTIIPDPEG              | 226 |
| <i>Crassostrea gigas</i>              | IDPKGTILROITIMNDLPVGRSVDETLRLVQAFOYTDTGHEVCPAGWKPG--SDTIIPDPEG              | 238 |
| <i>Ciona robusta</i>                  | IDTGKILRQITINDLPVGRSVDETLRLVKAFOQTDGHEVCPAGWKPG--DDTIKPDVQD                 | 189 |
| <i>Xenopus laevis</i>                 | IDDGKILRQITINDLPVGRSVDETLRLVQAFOYTDVHGEVCPAGWKPG--SSTIKPNVKD                | 193 |
| <i>Homo sapiens</i>                   | IDGKGVLRQITVNDLPVGRSVDEALRLVQAFOYTDEHGEVCPAGWKPG--SDTIKPNVDD                | 189 |
| <i>Mus musculus</i>                   | IDAKGVLRQITVNDLPVGRSVDEALRLVQAFOYTDEHGEVCPAGWKPG--SDTIKPNVDD                | 189 |
| <i>Danio rerio</i>                    | IDDKGILRQITINDLPVGRSVDETLRLVQAFOQHTDKYGEVCPAGWKPG--SDTIKPDVQK               | 189 |
| <i>Python bivittatus</i>              | IDDKGILRQITVNDLPVGRSVDETLRLVQAFOQHTDQHGEVCPAGWQPG--GDTIKPTVKD               | 189 |
|                                       | ** * : * : * : * : * : * : * : * : * : * : * : * : * : *                    |     |
| <i>Clonorchis sinensis</i>            | AQEYFSSVN--                                                                 | 195 |
| <i>Culex pipiens quinquefasciatus</i> | SKEYFNKHG--                                                                 | 232 |
| <i>Botrylloides leachii</i>           | KMKYFQKMREL                                                                 | 237 |
| <i>Crassostrea gigas</i>              | SQKYFSKQNN-                                                                 | 248 |
| <i>Ciona robusta</i>                  | SQKYFSKQ---                                                                 | 197 |
| <i>Xenopus laevis</i>                 | SKEFFSKEY--                                                                 | 202 |
| <i>Homo sapiens</i>                   | SKEYFSKHN--                                                                 | 198 |
| <i>Mus musculus</i>                   | SKEYFSKHN--                                                                 | 198 |
| <i>Danio rerio</i>                    | SKEFFSKQ---                                                                 | 197 |
| <i>Python bivittatus</i>              | SKLFFSKQ--                                                                  | 198 |
|                                       | : * :                                                                       |     |

|                                |                                                                 |     |
|--------------------------------|-----------------------------------------------------------------|-----|
| <i>Botrylloides leachii</i>    | -----MATLRSCASLVTKSIAASK                                        | 19  |
| <i>Drosophila melanogaster</i> | ---MSF-----V-----AR-----SLIRNVPLMGK---AIL-----                  | 20  |
| <i>Schistosoma haematobium</i> | -----MLLQVLI-----                                               | 7   |
| <i>Ciona robusta</i>           | -----MFINRLVHGFRTH-----TLQSSSLNPWI-----                         | 24  |
| <i>Scylla paramamosain</i>     | -----LKNIAV--TATRTVL-----                                       | 17  |
| <i>Danio rerio</i>             | MAATIG---RLLGASARGAAVCGCLKTLVPRNGASVI-----RAPQPLA-----          | 40  |
| <i>Python bivittatus</i>       | MAALTGVLRRLLKPSSGWT-----GATLWRAGAVAGRCLSGAASGRKCAADA-----       | 47  |
| <i>Xenopus laevis</i>          | MAASCG---RLLASWVGRT-----GRLTGQ-LPRVAG---SSVPRNMTAVTPSI-----     | 42  |
| <i>Anas platyrhynchos</i>      | MAAALG---RLLRSAPVAA-----GRRLQ-----GR-----                       | 23  |
| <i>Homo sapiens</i>            | MAAAVG---RLLRASVARH-----VSAIPW-GISATAALRPACGRSTSLTNLL-----      | 44  |
| <i>Mus musculus</i>            | MAAAAG---RLLWSSVARH-----ASAIRS-SISASTVLRPVASRRTCLTDIL-----      | 44  |
|                                |                                                                 |     |
| <i>Botrylloides leachii</i>    | QLRLLVANHHRLPLSSSSRNHVAQVTQPAPDF-----                           | 51  |
| <i>Drosophila melanogaster</i> | ---SQQKQIAARLLHQTAPLAAVRVQQPAPDFKGLAVVDNSFQEVKLEDYRGKYLVLFFY    | 77  |
| <i>Schistosoma haematobium</i> | ---KGALRYNRSFVSNLCRHYAAHVQRPAPDFCGTAVVDGQFKEIKLRDYAGKYLVLFFY    | 64  |
| <i>Ciona robusta</i>           | ---SKWNPNSASISTSCRMVAQVTQPAPDFKGMSSVVEGKFKEISLEDYKSKYLVLFFY     | 80  |
| <i>Scylla paramamosain</i>     | ---PRITAAQRLGSTSVRCLAPAVTQPAPSFKAQAVVNGDFKELSLEDYRGKYLVLFFY     | 74  |
| <i>Danio rerio</i>             | ---C---IAAQKACFSISAARWAPVTAAPHFKGTAVINGEFKEISLGDFKGYLVLFY       | 95  |
| <i>Python bivittatus</i>       | ---TLPVRFHFSTASRFPVPAVTQHAPYFKGTAVVDGDFKELSDDDFKGYLVLFY         | 102 |
| <i>Xenopus laevis</i>          | ---C---AAQKLQFSTSSGRFLPAVTQHAPQFKGTAVVNGEFKELSLEDYKGYLVLFY      | 96  |
| <i>Anas platyrhynchos</i>      | ---PQLLAHRQLSLGASRLAPVTAHAPFFKGTAVVHGEFKEISLDDFKGYLVLFY         | 78  |
| <i>Homo sapiens</i>            | ---CSGSSQA-KLFSTSSSCHAPAVTQHAPYFKGTAVVNGEFKDLSDDFKGYLVLFY       | 100 |
| <i>Mus musculus</i>            | ---WSASAQGSASFSTSSSFHTPAVTQHAPYFKGTAVVNGEFKELSDDFKGYLVLFY       | 101 |
|                                | * : * * *                                                       |     |
|                                |                                                                 |     |
| <i>Botrylloides leachii</i>    | -----QDSRFSHLASVNTPRSKYFGFDTRIPL                                | 78  |
| <i>Drosophila melanogaster</i> | PLDFTFVCPTETVAFSERIKEFHDIINTEVLGVSVDSHFSLHTWCNVDKNGGVQLKYPL     | 137 |
| <i>Schistosoma haematobium</i> | PLDFTFVCPTETLAFSDRIDEFKNEGVVGVSTDSHFSLHAWINTPRKEGGLGCLRYPL      | 124 |
| <i>Ciona robusta</i>           | PLDFTFVCPTETISFSDKSPFEFKLDTAVVGASVLSHFSLHAWINTPRKQGGGLGEMKIP    | 140 |
| <i>Scylla paramamosain</i>     | PLDFTFVCPTETIAFSDHMAAFRELNCEVVGVSVDSHFSLHAWNNMPRKQGGGLGQYTL     | 134 |
| <i>Danio rerio</i>             | PLDFTFVCPTETVAFSDKANEFHVNCAVVGVSVDSHFTHLAWTNTPRKSGGLGKIQIPL     | 155 |
| <i>Python bivittatus</i>       | PLDFTFVCPTETIAFSDKANEFHVNCDVLAVSVDSHFCHLAWINTPRKSGGLGHMNIPL     | 162 |
| <i>Xenopus laevis</i>          | PLDFTFVCPTETVAFSNKANEFHVNCEVAVSVDSHFCHLAWTNTPRKSGGLGQMNIP       | 156 |
| <i>Anas platyrhynchos</i>      | PLDFTFVCPTETVAFSNKANEFRDNCVAVSVDSHFCHLAWINTPRKSGGLGKMNIPL       | 138 |
| <i>Homo sapiens</i>            | PLDFTFVCPTETVAFSDKANEFHVNCEVAVSVDSHFSLHAWINTPRKNGGLGHMNIPL      | 160 |
| <i>Mus musculus</i>            | PLDFTFVCPTETVAFSDKANEFHVNCEVAVSVDSHFSLHAWINTPRKNGGLGHMNIPL      | 161 |
|                                | * * : * * : * * . * * . :                                       |     |
|                                |                                                                 |     |
| <i>Botrylloides leachii</i>    | LSDFNKTIKEYGILVEQAGVALRGTYIIDTNGIVRHLVNDVSVGRSDEILRLVQAFQ       | 138 |
| <i>Drosophila melanogaster</i> | LSDLTKKISADYDVLLDKEGISLRGTFIIDPNGILRQYSINDLPVGRSDEVLRLIKAFQ     | 197 |
| <i>Schistosoma haematobium</i> | LADYQKQITRDYGVLEQELGVALRGLFIINPDGIVRQITINDLPVGRSDEVLRLVRAQFQ    | 184 |
| <i>Ciona robusta</i>           | LSDITKQISRDYGVLLLENAGIALRGLFIIPSGTIRHASVNDLPVGRSDEVLRLVQAFQ     | 200 |
| <i>Scylla paramamosain</i>     | LADLNKTIISRDYGVLLLEDDGVALRGLFLIDPEGVVRHMSINDLPVGRSVEETLRLVKAQFQ | 194 |
| <i>Danio rerio</i>             | LADLTQVSRDYGVLLGEGGIALRGLFIIDPNGIVRHMSSVNDLPVGRSVEETLRLVKAQFQ   | 215 |
| <i>Python bivittatus</i>       | LSDLTKQISRDYGVLLIEGSGIALRGLFIIDPNGIKHLSVNDLPVGRSVEETLRLVKAQFQ   | 222 |
| <i>Xenopus laevis</i>          | LSDLNKQISRDYGVLLTAGIALRGLFIIDPNGIKHMSVNDLPVGRSVEETLRLVKAQFQ     | 216 |
| <i>Anas platyrhynchos</i>      | LSDLTKQISRDYGVLLGEGGIALRGLFIIDPNGVIKHLVNDLPVGRSVEETLRLVKAQFQ    | 198 |
| <i>Homo sapiens</i>            | LSDLTKQISRDYGVLLGEGGIALRGLFIIDPNGVIKHLVNDLPVGRSVEETLRLVKAQFQ    | 220 |
| <i>Mus musculus</i>            | LSDITKQISRDYGVLLSAGIALRGLFIIDPNGVVKHLVNDLPVGRSVEETLRLVKAQFQ     | 221 |
|                                | * : * * : : * : * : * : * : * : * : * : * : * : *               |     |
|                                |                                                                 |     |
| <i>Botrylloides leachii</i>    | FXDEHGQCLPSSWKPGRS--DSIKPTVEGSKEYFDKIE-                         | 173 |
| <i>Drosophila melanogaster</i> | FVEQHGEVCPANWNPNSNPATIKPDVEESKKYFSKHG-                          | 234 |
| <i>Schistosoma haematobium</i> | FTDKHGEVCPAGWQPKG--PTIKPDLKKYKEYFHKVN-                          | 219 |
| <i>Ciona robusta</i>           | FVDRKHGEVCPASWTPGS--KTIKPSVDGSKTYFEEAN-                         | 235 |
| <i>Scylla paramamosain</i>     | FVAEHGEVCPANWQPS--PTIKPDPTGSLEYFNKVN-                           | 229 |
| <i>Danio rerio</i>             | FVETHGEVCPASWTPKS--PTIKPTPDGSKEYFEKVN-                          | 250 |
| <i>Python bivittatus</i>       | YVETHGEVCPANWIPDS--PTIKPSPEASKEYFAKVNK                          | 258 |
| <i>Xenopus laevis</i>          | FVETHGEVCPAXWTPDS--PTIKPSPEGSKEYFEKVH-                          | 251 |
| <i>Anas platyrhynchos</i>      | YVETHGEVCPANWTPDS--PTIKPSPEGSKEYFEKVHK                          | 234 |
| <i>Homo sapiens</i>            | YVETHGEVCPANWTPDS--PTIKPSPAASKEYFQKVNQ                          | 256 |
| <i>Mus musculus</i>            | FVETHGEVCPANWTPES--PTIKPSPTASKEYFEKVHQ                          | 257 |
|                                | : * * : * * : * * : * * : * * :                                 |     |

**Figure S5.** Schematic Prdx3 domain organization. The AhpC-TSA domain is highlighted in light grey, the 1-cysPrx\_C domain is highlighted in dark grey. For *C. robusta*, alpha helices and beta sheets are boxed with dotted and continues lines respectively; amino acids of the catalytic center are indicated in bold and underlined. \*= identical amino acids (completely preserved), := very similar amino acids (semi-conservative substitution), .= similar amino acids (conservative substitution); numerals refer to character counts.

|                                                                               |                                                                |     |
|-------------------------------------------------------------------------------|----------------------------------------------------------------|-----|
| <i>Ciona robusta</i>                                                          | -----MGVSFQLFTLACLFLA-----H                                    | 17  |
| <i>Botrylloides leachii</i>                                                   | -----MKLFII-CFIIVTVLAN-----DEE                                 | 19  |
| <i>Scylla paramamosain</i>                                                    | -----MSRLNLVLLACLVL-----G-----LSVH                             | 18  |
| <i>Sepiella maindroni</i>                                                     | -----MALVGVNLLCLLVLI-----SSA                                   | 18  |
| <i>Mus musculus</i>                                                           | MEARSK-----LLDGTASRRWTRKLVLLPPLLFLLRTESE--QGLESDE              | 46  |
| <i>Python bivittatus</i>                                                      | MEVGRQARGPPSESQAARMSGRGRLKPVSEPLAVYSMVLLMLAATMSEEAGTAEAAQS     | 60  |
| <i>Danio rerio</i>                                                            | MD--VSRC-----V-----KTPREWLGVLWA-LLLL-SESVVC-----DGA            | 32  |
| <i>Homo sapiens</i>                                                           | --MEALPL-----LAAT-TPDHGRHRRLLLP-LLLFLLPAGAVQG--WETEER          | 43  |
| <i>Xenopus laevis</i>                                                         | MALQLRRY-----L-----RGSFAVTLCL-LLLLSAAAVTCEEEQSQARPG            | 39  |
| <i>Anas platyrhynchos</i>                                                     | MEAGRRL-----RAGT-RTGTGTGGSALLVA-V-LAVLAVCGAAAEADPRAA           | 46  |
| .                                                                             |                                                                |     |
| <i>Ciona robusta</i>                                                          | SGICQ-----ERAV-----FWPPYSHLLQSTKAQISKAPAPWEGTAIVDGEIKTIKL      | 65  |
| <i>Botrylloides leachii</i>                                                   | QKYGG-----MPGM-----FWPPYQSHLLQSTKAQISKAPAPWEGTAIVDGEIKTIKS     | 67  |
| <i>Scylla paramamosain</i>                                                    | GSLAEEQCHTFAGGAVYPNTEGR--ASGHTLQWTSAMISKAPAPWEGTAVVDGQLQELKL   | 76  |
| <i>Sepiella maindroni</i>                                                     | VCIADKCYSFAGGQVYPQEDRK--MSGHTIQWSKAIISKAPADWNGTAVINGKFEEIGL    | 76  |
| <i>Mus musculus</i>                                                           | FRTRENECHFYGAGGQVYPGEASRVSVADHSLHLSKAKISKAPAPWEGTAVINGEFKELKL  | 106 |
| <i>Python bivittatus</i>                                                      | YGYGDEKCHYYAGGEVYPGEASRVSVADHSLHLSKAKISKAPADWEGTAVINGEFKELKL   | 120 |
| <i>Danio rerio</i>                                                            | NGKREQECYNYAGGHVYPGEAFRVPSVDSHLSHLSKAKISKAPAPWEGTAVINGEFKELKL  | 92  |
| <i>Homo sapiens</i>                                                           | PRTREEECHFYGAGGQVYPGEASRVSVADHSLHLSKAKISKAPAPWEGTAVIDGFEKELKL  | 103 |
| <i>Xenopus laevis</i>                                                         | RTAPDGECHFYGAGGQVYPGEASRVPSVDSHLSHLSKAKISKAPAPWEGTAVINGEFKELKL | 99  |
| <i>Anas platyrhynchos</i>                                                     | RQRGDEQCHYYAGGQVYPGEAARLPVTDHSLHLSQAKISKAPAPWEGTAVINGEFKELKL   | 106 |
| . * : : . * * * * * : * : : : : : : : .                                       |                                                                |     |
| <i>Ciona robusta</i>                                                          | GDYKGYLVFFFYPLDFTFVCPTETIAFSDRVAEFRKINAENVVAASVDSHFTHLAWINTP   | 125 |
| <i>Botrylloides leachii</i>                                                   | DDYLGKYLIFFFYPLDFTFVCPTETIAFSDRAEEFRKIGAEVVACSVDSHFTHLAWINTP   | 127 |
| <i>Scylla paramamosain</i>                                                    | TDYRGKYLIVFFFYPLDFTFVCPTETIAFNDRVEEFRALNAEVVACSIDSHFTHLAWINTP  | 136 |
| <i>Sepiella maindroni</i>                                                     | RSYKGYLVFFFYPLDFTFVCPTETIAFSDRIEEFKDLNPKVVACSVDSQFTHLAWINTP    | 136 |
| <i>Mus musculus</i>                                                           | TDYRGKYLIVFFFYPLDFTFVCPTETIAFGDRIEEFKSINTEVVACSVDSQFTHLAWINTP  | 166 |
| <i>Python bivittatus</i>                                                      | TDYEGKYLVFFFYPLDFTFVCPTETIAFSDRIEEFRAIDAEVVACSVDSQFTHLAWINTP   | 180 |
| <i>Danio rerio</i>                                                            | SDYKGYLVFFFYPLDFTFVCPTETIAFSDRVHEFQAINAEVVACSVDSQFTHLAWINTP    | 152 |
| <i>Homo sapiens</i>                                                           | TDYRGKYLIVFFFYPLDFTFVCPTETIAFGDRLEEFKRSINTEVVACSVDSQFTHLAWINTP | 163 |
| <i>Xenopus laevis</i>                                                         | TDYKGYLVFFFYPLDFTFVCPTETIAFGDRIEEFRSINTEVVACSVDSQFTHLAWINTP    | 159 |
| <i>Anas platyrhynchos</i>                                                     | TDYEGKYLVFFFYPLDFTFVCPTETIAFSDRIEEFRAINTEVVACSVDSKFTHLAWINTP   | 166 |
| . * * * * : * : : : : * : * * * : : : : * : * : : * : * : : * : * .           |                                                                |     |
| <i>Ciona robusta</i>                                                          | RSEGGGLKLNPLLSDLTHQISRDYGVLLDLGHTLRGLFIIDKILRQITMNDLPVGR       | 185 |
| <i>Botrylloides leachii</i>                                                   | RKEGGGLKINIPLLSDLTHKISRDIYGVLLDLGHTLRGLFIIDPKGILRQITMNDLPVGR   | 187 |
| <i>Scylla paramamosain</i>                                                    | RKDGGGLKGLKIPLSDITHKISKDYGVYLEDQGIALRGLFIIDNKGVLRLQITMNDLPVGR  | 196 |
| <i>Sepiella maindroni</i>                                                     | RNKGGLGHLKIPLSDITHKISKAYGVYLNQNLGHSRLGLFIIDTKGILRQITMNDLPVGR   | 196 |
| <i>Mus musculus</i>                                                           | RRQGGLGPIRIPLLSDLNHQISKDYGVYLEDGHTLRGLFIIDDKGVLRLQITMNDLPVGR   | 226 |
| <i>Python bivittatus</i>                                                      | RKQGGLGPVKIPLSDLTHQISKDYGVYLEDQGHALRGLFIIDDKILRLQITMNDLPVGR    | 240 |
| <i>Danio rerio</i>                                                            | RKQGGLGPMKIPLSDLTHQISKDYGVYLEDQGHTLRGLFIIDKGVLRLQITMNDLPVGR    | 212 |
| <i>Homo sapiens</i>                                                           | RRQGGLGPIRIPLLSDLTHQISKDYGVYLEDGHTLRGLFIIDDKGILRQITMNDLPVGR    | 223 |
| <i>Xenopus laevis</i>                                                         | RKQGGLGPMKIPLSDLTHQISKDYGVYLEDQGHTLRGLFIIDDKGVLRLQITMNDLPVGR   | 219 |
| <i>Anas platyrhynchos</i>                                                     | RKQGGLGPMKIPLSDLTHQISKDYGVYLEDQGHTLRGLFIIDDKRILRLQITMNDLPVGR   | 226 |
| * . * * * : * : : : : * : * * * : * : : * : * : : * : * : : * : * : * : * : * |                                                                |     |
| <i>Ciona robusta</i>                                                          | SVDETLLRLVQAFQHTDEHGEVCPA-GWEPGKDTIIPDPKDKLKYFHKTSKAKGEL       | 239 |
| <i>Botrylloides leachii</i>                                                   | SVDETLLRLVQAFQHTDEHGEVCPA-GWQPGSDTIIPDPEGKMKYFQKMREL----       | 237 |
| <i>Scylla paramamosain</i>                                                    | SVDETLLRLVQAFQHTDEHGEVCPA-GWKPGDDTIIPNPQEKLYFKKANQ----         | 245 |
| <i>Sepiella maindroni</i>                                                     | SVDETLLRLVQAFQYTDHGEVCPA-GWKPGADTIIPDPKDKLKYFEKANS----         | 245 |
| <i>Mus musculus</i>                                                           | SVDETLLRLVQAFQYTDKHGEDNPRSSWKTEVFRQAKLKSTSVMMFGPSQ----         | 275 |
| <i>Python bivittatus</i>                                                      | SVDETLLRLVQAFQYTDKHGEVCPA-GWKPGSETIIPDPAGKLYFGKVN-----         | 288 |
| <i>Danio rerio</i>                                                            | SVDETLLRLVQAFQYTDKHGEVCPA-GWKPGSDTIIPDPAGKLYFDKLN-----         | 260 |
| <i>Homo sapiens</i>                                                           | SVDETLLRLVQAFQYTDKHGEVCPA-GWKPGSETIIPDPAGKLYFDKLN-----         | 271 |
| <i>Xenopus laevis</i>                                                         | SVDETLLRLVQAFQYTDKHGEVCPA-GWKPGSETIIPDPAGKLYFDKQH-----         | 267 |
| <i>Anas platyrhynchos</i>                                                     | SVDETLLRLVQAFQYTDKHGEVCPA-GWKPGSETIIPDPAGKLYFDKLN-----         | 274 |
| * * * * * : * : * * * * : * : : * : * : : * : * : : * : * : : * : * : : * : * |                                                                |     |

**Figure S6.** Schematic Prdx4 domain organization. The AhpC-TSA domain is highlighted in light grey, the 1-cysPrx\_C domain is highlighted in dark grey. For *C. robusta*, alpha helices and beta sheets are boxed with dotted and continues lines respectively; amino acids of the catalytic center are indicated in bold and underlined. \*= identical amino acids (completely preserved), := very similar amino acids (semi-conservative substitution), .= similar amino acids (conservative substitution); numerals refer to character counts.



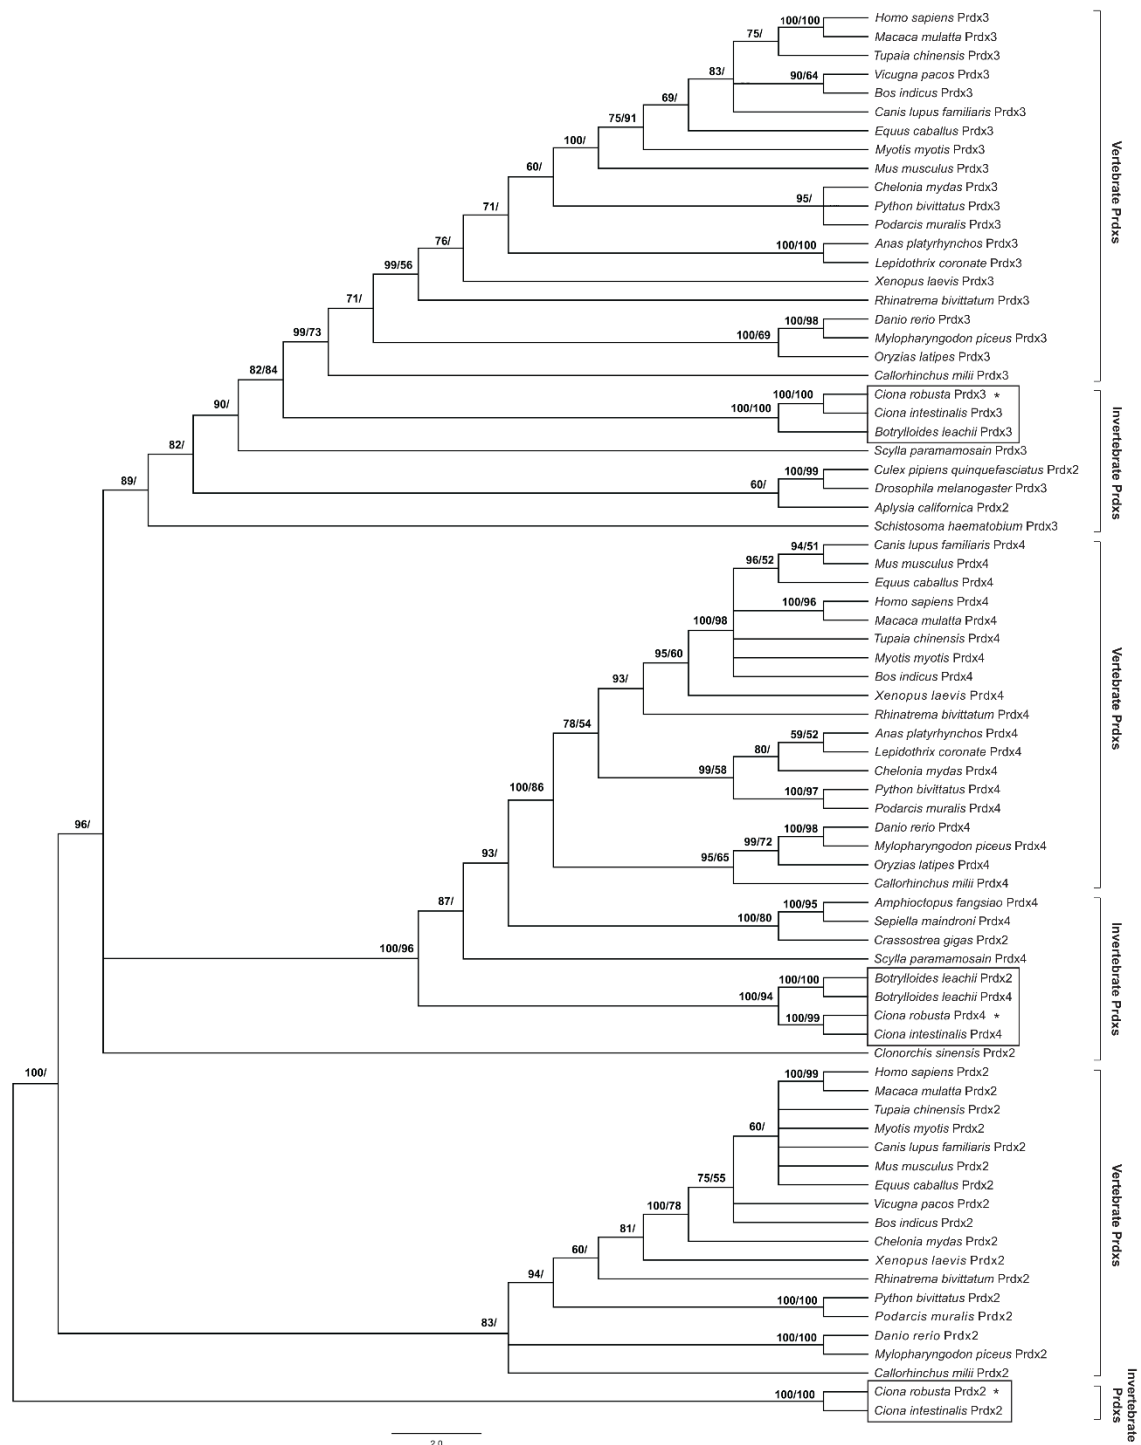

**Figure S7.** Phylogenetic relationships among Prdx isoforms of various organisms reconstructed on the amino acid sequences and using both Bayesian interference (BI) and Maximum likelihood (ML) methods. Bayesian posterior probability (first number) and bootstrap values higher (and equal to) than 50% are indicated on each node, respectively. The scale for branch length (2.0 substitution/site) is shown below the tree.
